# Supplementary material
Source: Springer Nature journal article supplement (https://www.springermedizin.de/resource/supplementary/12931_2010_1038_MOESM1_ESM.pdf/9425426)

**A**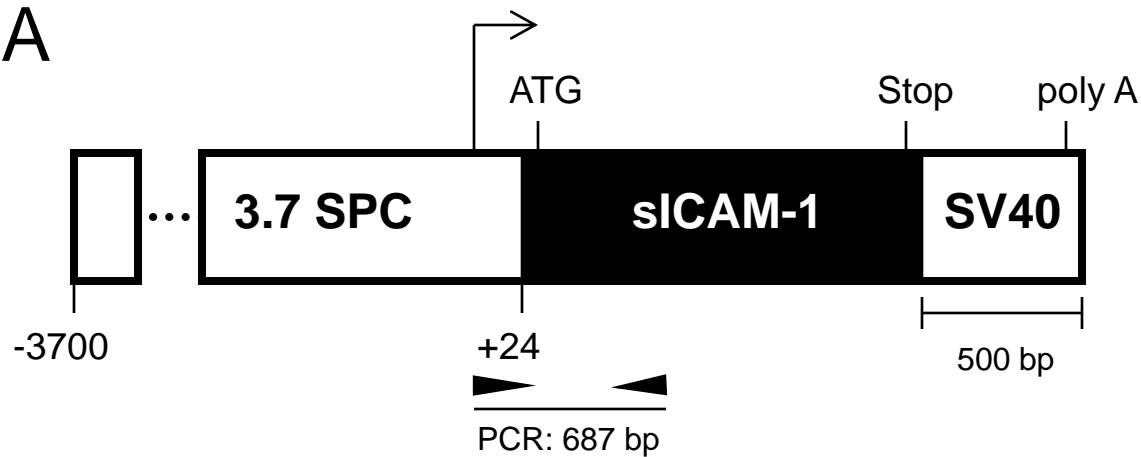**B**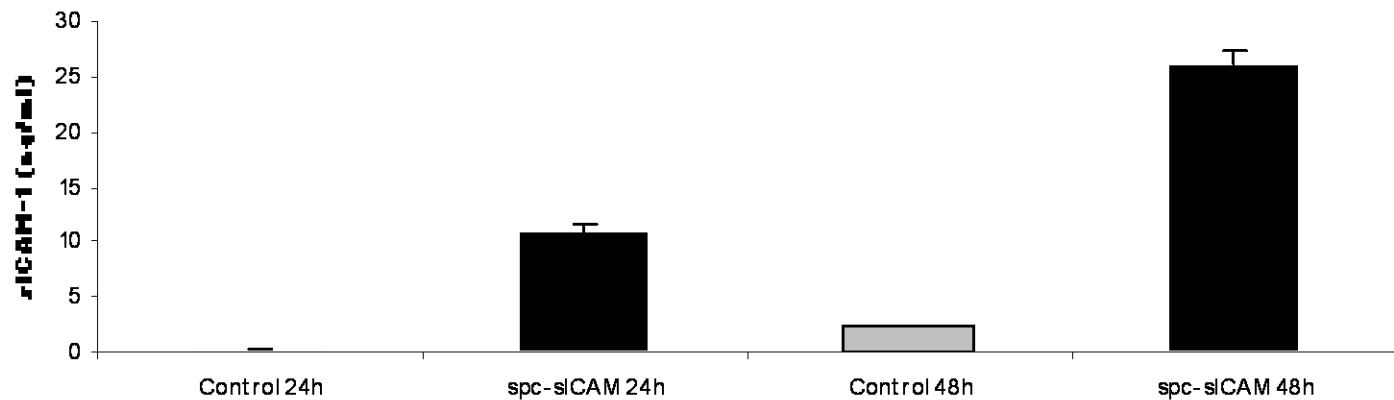

Supplement: MOESM1 [file 9425426]
